# Supplementary material for: The Piezo–Fenton synergistic effect of ferroelectric single-crystal BaTiO3 nanoparticles for high-efficiency catalytic pollutant degradation in aqueous solution
Source: Royal Society of Chemistry journal article supplement (doi:10.1039/d2dt01248k), 2022-01-01
Supplement: d2dt01248k1.pdf [file d2dt01248k1.pdf]

## Supplementary Information

### **Piezo-Fenton synergistic effect of ferroelectric single-crystal BaTiO<sub>3</sub> nanoparticles for high-efficiency catalytic pollutants degradation in aqueous solution**

Hongcheng Gao<sup>\*a</sup>, Yuanguang Zhang<sup>a</sup>, Hongyu Xia<sup>a</sup>, Xiaoxia Mao<sup>a</sup>, Xiaojing Zhu<sup>b</sup>, Shihao Miao<sup>a</sup>, Mengqin Shi<sup>a</sup>, and Shijiao Zha<sup>\*c</sup>

<sup>a</sup>Key Laboratory of Aqueous Environment Protection and Pollution Control of Yangtze River in Anhui of Anhui, Provincial Education Department, College of Resources and Environment, Anqing Normal University, Anqing 246011, China

<sup>b</sup>Research Center of Advanced Chemical Equipment, Chemistry and Chemical Engineering Guangdong Laboratory, Shantou 515041, China

<sup>c</sup>School of Earth and Environment, Anhui University of Science and Technology, Huainan 232001, China

\*Corresponding Authors

Email: hongchenggao@aqnu.edu.cn (H. Gao); zhashijiao1991@aust.edu.cn (S. Zha).

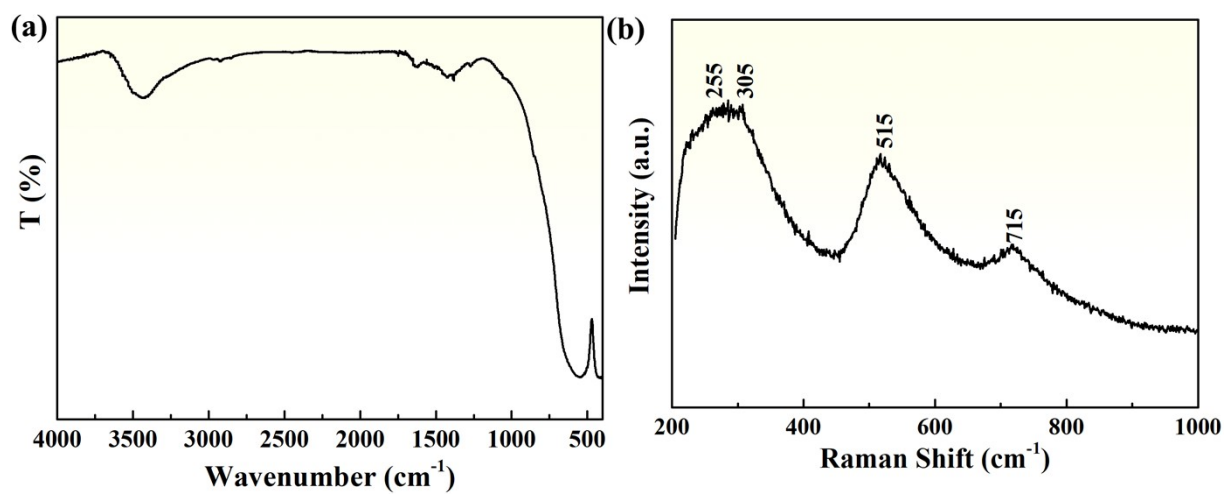

**Fig. S1.** (a) FT-IR spectra and (b) Raman spectra of BT nanoparticles.

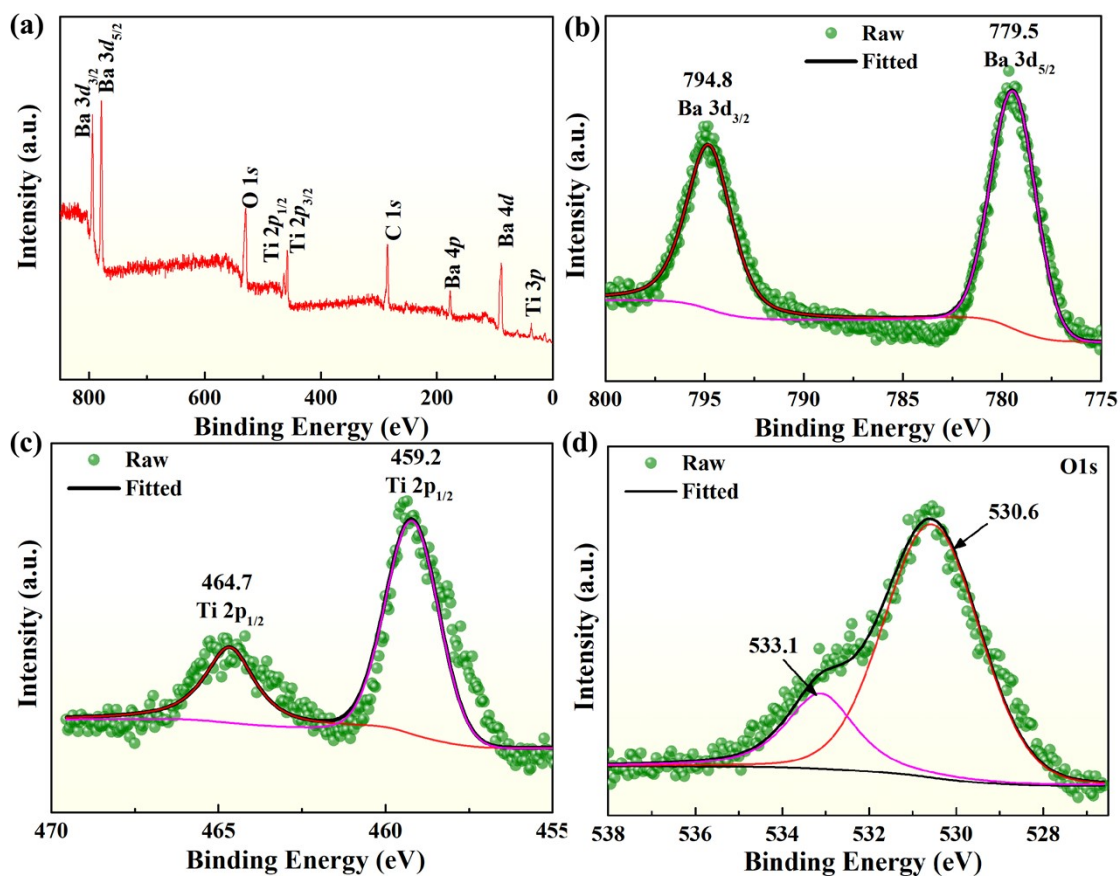

**Fig. S2.** XPS spectra of BT: (a) survey spectrum, high-resolution spectra of Ba3d (b), Ti 2p (c) and O 1s (d).

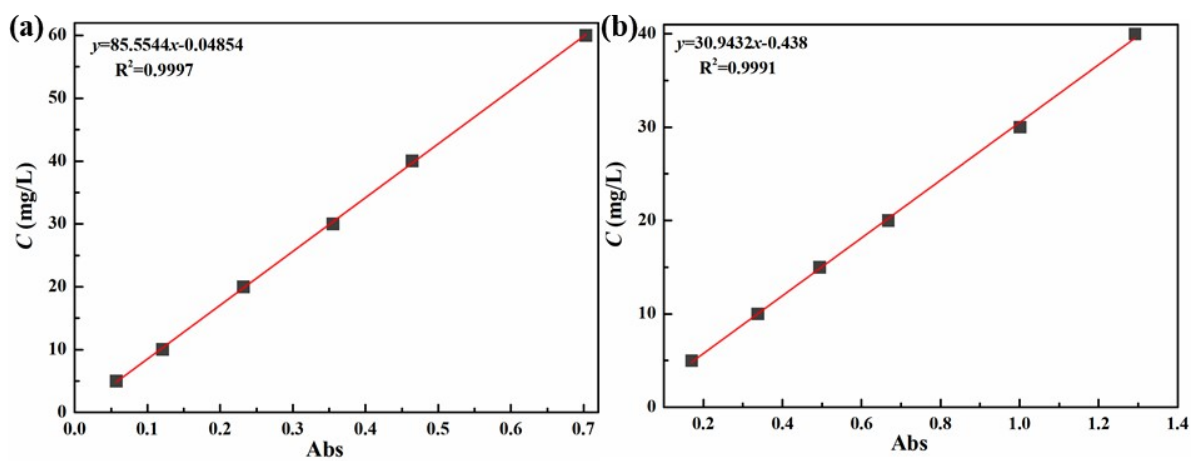

**Fig. S3.** Standard curves for analyzing different concentrations of (a) CR (5–60 mg/L) and (b)TH (5–40 mg/L) solutions.

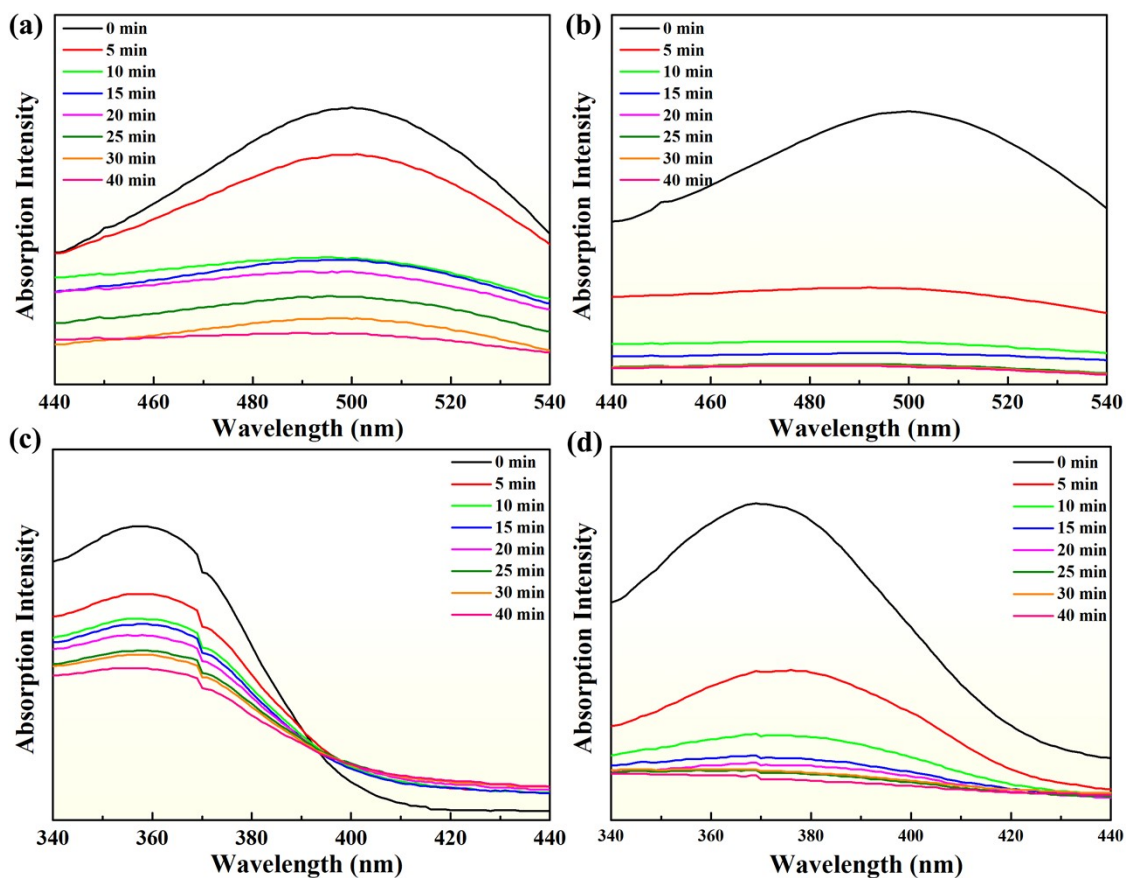

**Fig. S4.** Absorption spectra of the CR solutions (a)  $C_0 = 30$  mg/L and  $BT = 1$  g/L, (b)  $C_0 = 40$  mg/L and  $BT = 2$  g/L. Absorption spectra of the TH solutions (c)  $C_0 = 10$  mg/L and  $BT = 1$  g/L, (d)  $C_0 = 10$  mg/L and  $BT = 3$  g/L.

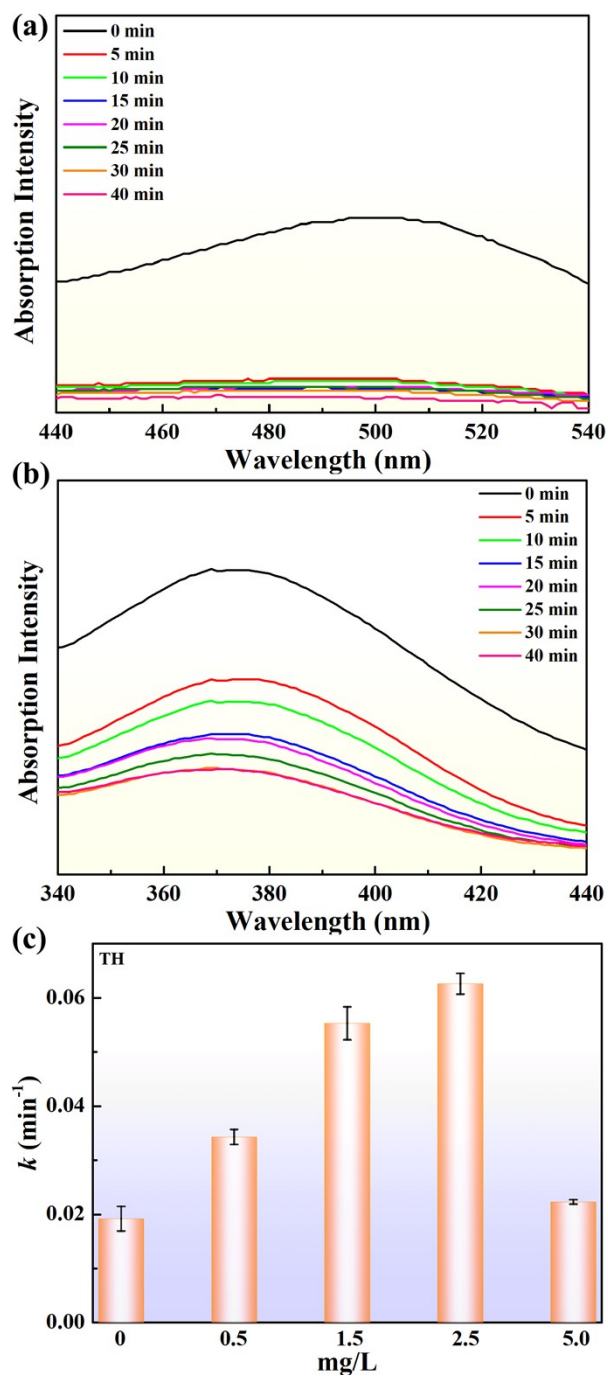

**Fig. S5.** Absorption spectra of the (a) CR and (b) TH solutions at Fe(II) concentration of 2.5 mg/L. (c) rate constants for TH at different Fe(II) concentrations.

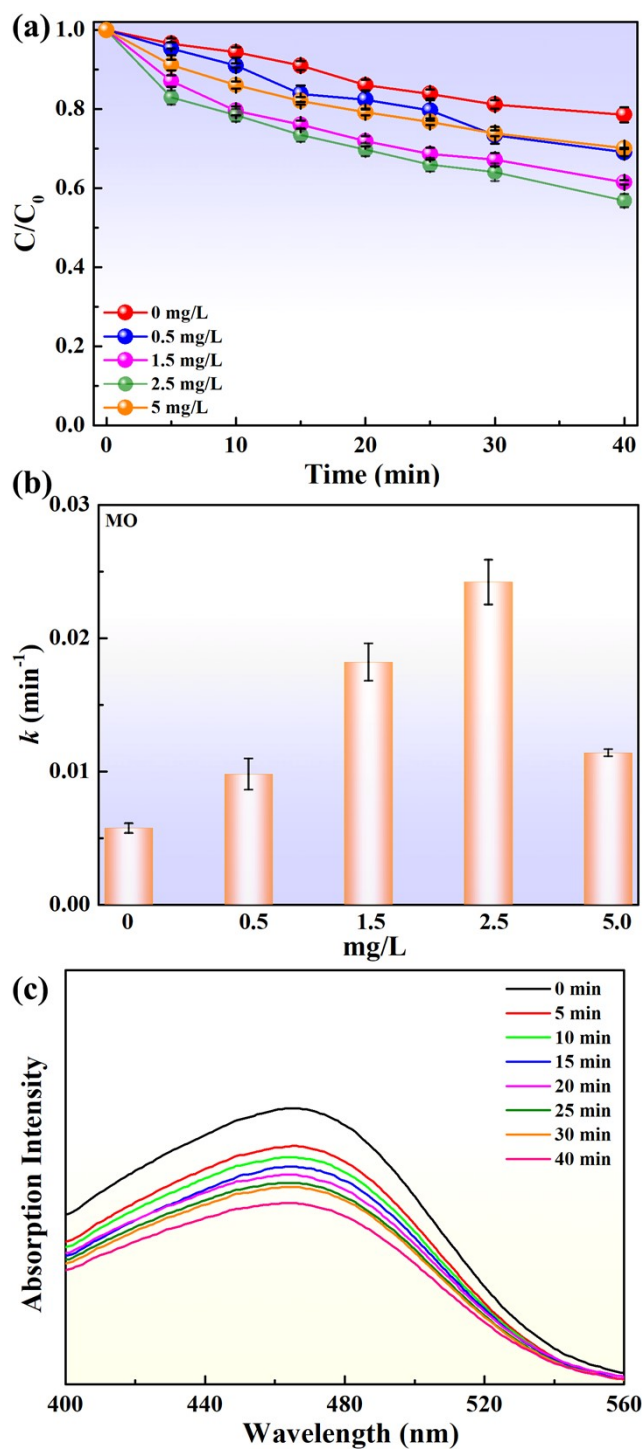

**Fig. S6.** (a) catalytic degradation curves, and (b) rate constants at different Fe(II) concentrations for MO solutions with initial concentration of 5 mg/L. (c) absorption spectra of the MO solutions at Fe(II) concentration of 2.5 mg/L.

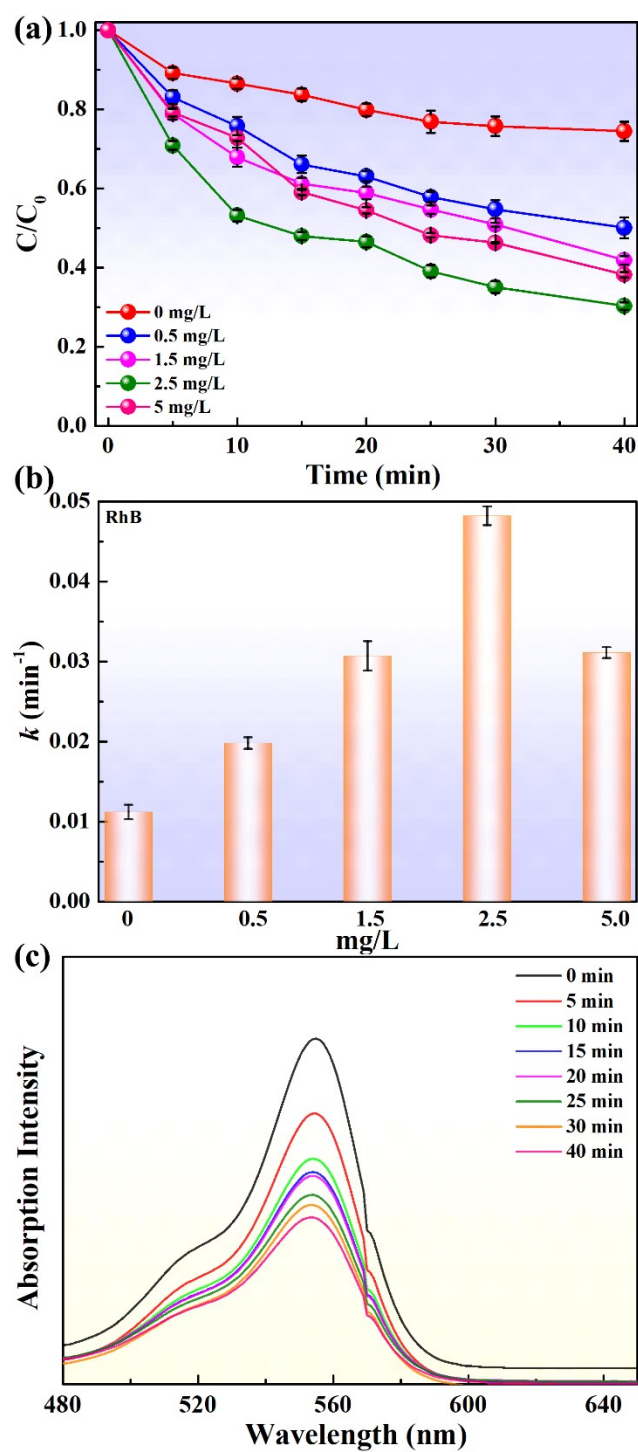

**Fig. S7.** (a) catalytic degradation curves, and (b) rate constants at different Fe(II) concentrations for RhB solutions with initial concentration of 10 mg/L. (c) absorption spectra of the RhB solutions at Fe(II) concentration of 2.5 mg/L.



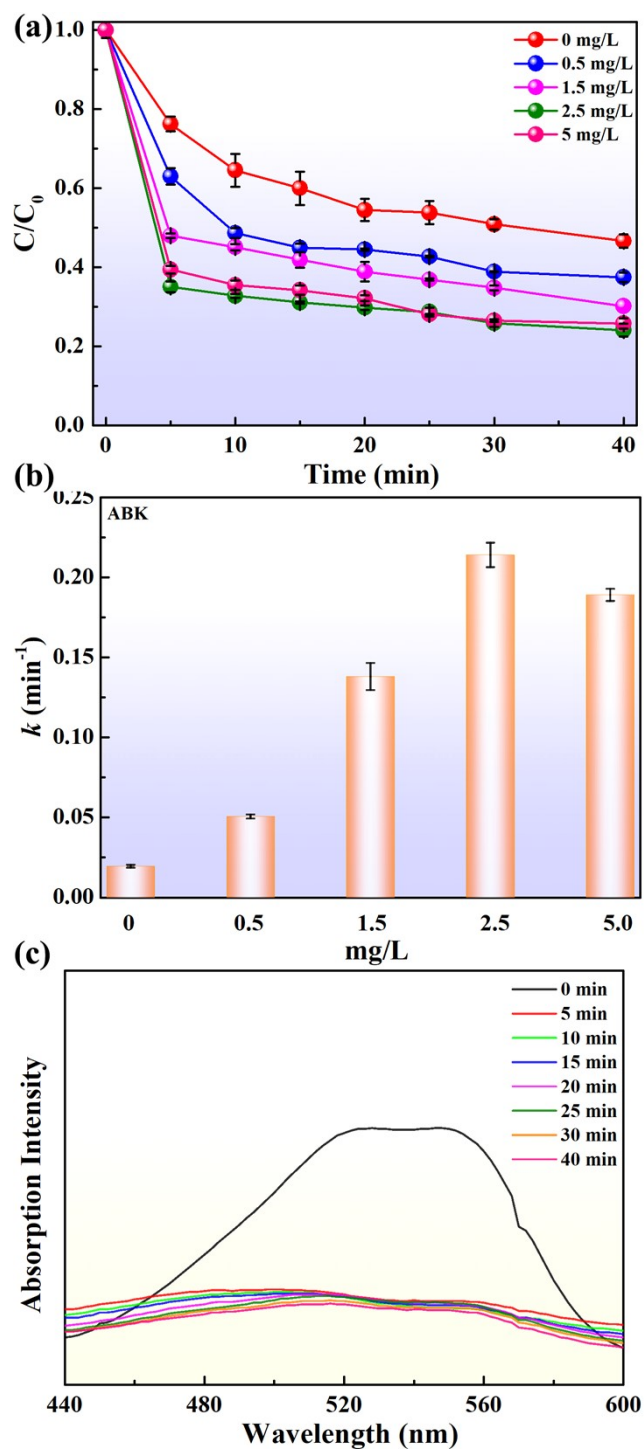

**Fig. S8.** (a) catalytic degradation curves, and (b) rate constants at different Fe(II) concentrations for ABK solutions with initial concentration of 10 mg/L. (c) absorption spectra of the ABK solutions at Fe(II) concentration of 2.5 mg/L.

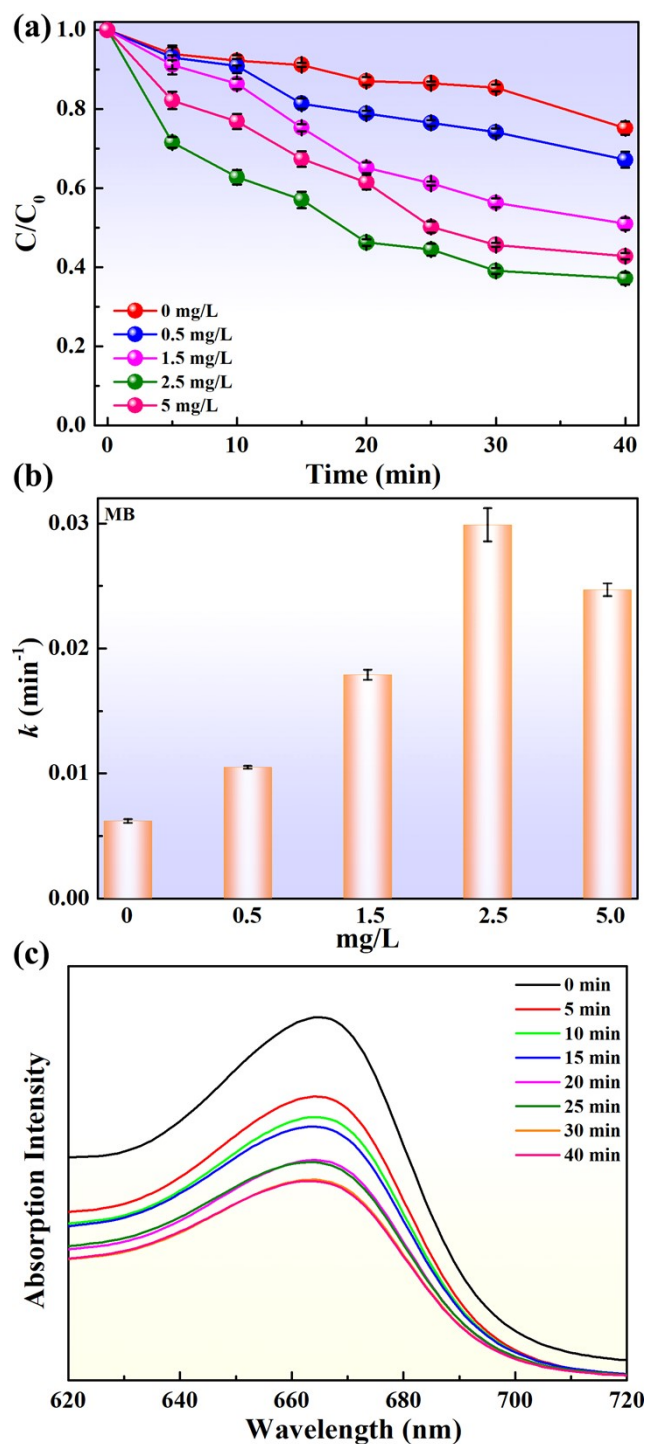

**Fig. S9.** (a) catalytic degradation curves, and (b) rate constants at different Fe(II) concentrations for MB solutions with initial concentration of 10 mg/L. (c) absorption spectra of the MB solutions at Fe(II) concentration of 2.5 mg/L.

| Piezocatalyst                                                                                                  | Dye species | Dye concentration (mg/L) | Catalyst dosage (g/L) | Ultrasonic source (kHz/W) | degradation efficiency (%/time (min)) | References |
|----------------------------------------------------------------------------------------------------------------|-------------|--------------------------|-----------------------|---------------------------|---------------------------------------|------------|
| BiFeO <sub>3</sub> micro-sheets                                                                                | RhB         | 10                       | 1                     | 40/*                      | 95/80                                 | [1]        |
| BaTiO <sub>3</sub> nanofibers                                                                                  | RhB         | 5                        | 0.1                   | 40/80                     | 97.5/60                               | [2]        |
| ZnO/BaTiO <sub>3</sub> heterostructures                                                                        | RhB         | 10                       | 1                     | 40/120                    | 97/30                                 | [3]        |
| Ag-BaTiO <sub>3</sub> heterostructures                                                                         | RhB         | 5                        | 1                     | *                         | 83/75                                 | [4]        |
| Bi <sub>0.5</sub> Na <sub>0.5</sub> TiO <sub>3</sub> nanorods                                                  | RhB         | 10                       | 1                     | 28/200                    | 95/70                                 | [5]        |
| Ag <sub>2</sub> O/Bi <sub>4</sub> Ti <sub>3</sub> O <sub>12</sub>                                              | RhB         | 20                       | 1                     | 84/60                     | 71/30                                 | [6]        |
| (Na <sub>0.5</sub> Bi <sub>0.5</sub> )TiO <sub>3</sub> -Ba(Ti <sub>0.5</sub> Ni <sub>0.5</sub> )O <sub>3</sub> | RhB         | 10                       | 1                     | 40/200                    | 90/60                                 | [7]        |
| Ag/BaTiO <sub>3</sub>                                                                                          | RhB         | 5                        | 1                     | */150                     | 93.9/120                              | [8]        |
| xBaTiO <sub>3</sub> /(1-x)KNbO <sub>3</sub>                                                                    | DLB5B       | *                        | 0.1                   | 45/*                      | 93.3/180                              | [9]        |
| BiFeO <sub>3</sub> /TiO <sub>2</sub> p-n heterojunction                                                        | TC          | 10                       | 1                     | *                         | 72.2/180                              | [10]       |
|                                                                                                                | MB          | 10                       | 1                     | *                         | 90.1/180                              |            |
| Na <sub>0.5</sub> Bi <sub>0.5</sub> TiO <sub>3</sub> nanoparticles                                             | RhB         | 10                       | 2                     | 40/150                    | 92/120                                | [11]       |
| Single-crystal BaTiO <sub>3</sub> nanoparticles                                                                | CR          | 10                       | 1                     | 80/50                     | 82.8, 92.2/5,40                       | This work  |

**Table S1. Comparison of piezocatalytic performance of various piezocatalysts**

\*unknown

**Table S2. The chemical properties of target molecules.**

| <b>Compound</b>               | <b>Formula</b>                                                                               | <b>Molar mass<br/>(g·mol<sup>-1</sup>)</b> | <b>Max rate constant<br/>(min<sup>-1</sup>)</b> | <b>degradation<br/>efficiency<br/>(%)</b> |
|-------------------------------|----------------------------------------------------------------------------------------------|--------------------------------------------|-------------------------------------------------|-------------------------------------------|
| Methyl orange                 | C <sub>14</sub> H <sub>14</sub> N <sub>3</sub> NaO <sub>3</sub> S                            | 327.33                                     | 0.0242                                          | 43.1                                      |
| Methylene blue                | C <sub>16</sub> H <sub>18</sub> ClN <sub>3</sub> S·3H <sub>2</sub> O                         | 373.9                                      | 0.0299                                          | 62.8                                      |
| Rhodamine B                   | C <sub>28</sub> H <sub>31</sub> ClN <sub>2</sub> O <sub>3</sub>                              | 479.01                                     | 0.0482                                          | 69.7                                      |
| Tetracycline<br>hydrochloride | C <sub>22</sub> H <sub>24</sub> N <sub>2</sub> O <sub>8</sub> ·HCl                           | 480.9                                      | 0.0626                                          | 72.6                                      |
| Acid chrome<br>blue K         | C <sub>16</sub> H <sub>9</sub> N <sub>2</sub> Na <sub>3</sub> O <sub>12</sub> S <sub>3</sub> | 586.41                                     | 0.214                                           | 75.9                                      |
| Congo red                     | C <sub>32</sub> H <sub>22</sub> N <sub>6</sub> Na <sub>2</sub> O <sub>6</sub> S <sub>2</sub> | 696.66                                     | 0.337                                           | 92.2                                      |

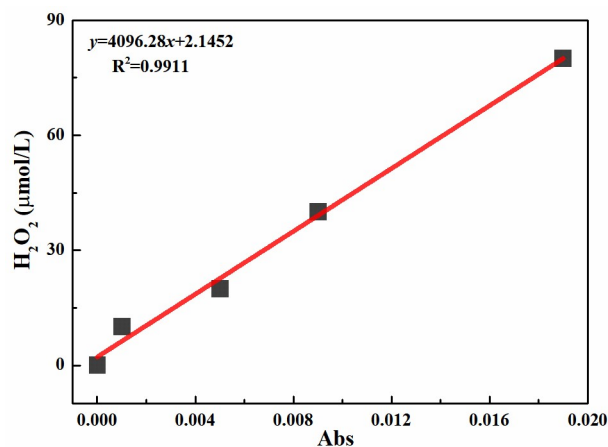

**Fig. S10.** The standard curves for analyzing different concentrations of H<sub>2</sub>O<sub>2</sub> with the Fenton-DPD method.

The Fenton-DPD method is commonly used for the measurement of low H<sub>2</sub>O<sub>2</sub> concentrations in aqueous solutions. The steps are as follows [12, 13]:

**Standard curve for the determination of H<sub>2</sub>O<sub>2</sub>:** Firstly, 18 mL of pH 3.0 HAC/AC<sup>-</sup> buffer stock solution (0.5 M), 5.0 mL of DPD stock solution (100 mM) and 1.5 mL of FeSO<sub>4</sub> stock solution (25 mM) were added to a 25 mL beaker flask. Then, 0.5 mL of sample containing different concentrations of H<sub>2</sub>O<sub>2</sub> was added under stirring. After 45 s, 3 mL the reaction solution was immediately transferred into 1 cm quartz cells to measure the absorbance at 551 nm. Subsequently, absorbance at 551 nm vs H<sub>2</sub>O<sub>2</sub> concentration were plotted to obtain the standard curves graph (Fig. S10).

**The general procedures to determine the H<sub>2</sub>O<sub>2</sub> concentration in BT sample:** Firstly, 18 mL of pH 3.0 HAC/AC<sup>-</sup> buffer stock solution (0.5 M), 5.0 mL of DPD stock solution (100 mM) and 1.5 mL of FeSO<sub>4</sub> stock solution (25 mM) were added to a 25 mL beaker flask. Then, 0.5 mL unknown concentrations of H<sub>2</sub>O<sub>2</sub> in sample was mixed with the solution. After 45 s, 3 mL the reaction solution was immediately transferred into 1 cm quartz cells to measure the absorbance at 551 nm. For unknown concentrations of H<sub>2</sub>O<sub>2</sub> in sample was determined with from Fig. S10 standard curves.

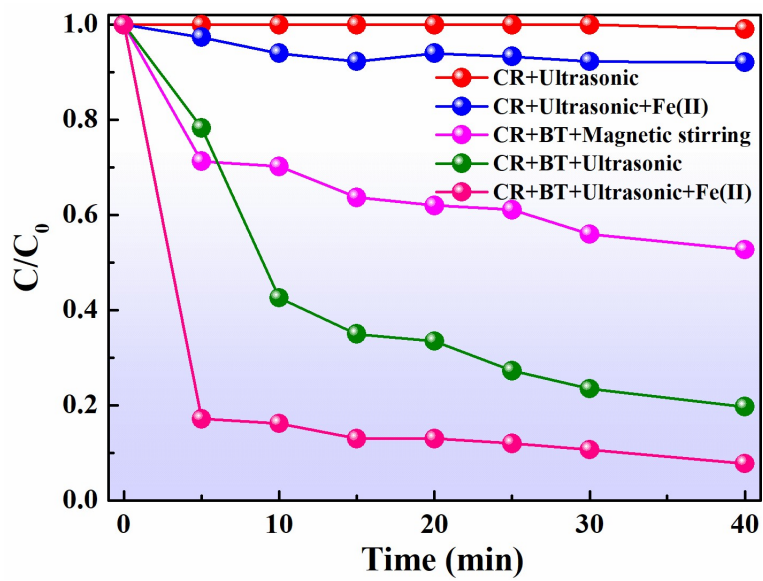

**Fig. S11.** Degradation curves for CR under different catalytic conditions.

## References

- [1] H. You, Y. Jia, Z. Wu, X. Xu, W. Qian, Y. Xia, M. Ismail, Strong piezo-electrochemical effect of multiferroic BiFeO<sub>3</sub> square micro-sheets for mechanocatalysis, *Electrochemistry Communications*, 79 (2017) 55-58.
- [2] X. Xu, Z. Wu, L. Xiao, Y. Jia, J. Ma, F. Wang, L. Wang, M. Wang, H. Huang, Strong piezo-electro-chemical effect of piezoelectric BaTiO<sub>3</sub> nanofibers for vibration-catalysis, *Journal of Alloys and Compounds*, 762 (2018) 915-921.
- [3] X. Zhou, S. Wu, C. Li, F. Yan, H. Bai, B. Shen, H. Zeng, J. Zhai, Piezophototronic effect in enhancing charge carrier separation and transfer in ZnO/BaTiO<sub>3</sub> heterostructures for high-efficiency catalytic oxidation, *Nano Energy*, 66 (2019) 104127.
- [4] S. Xu, Z. Liu, M. Zhang, L. Guo, Piezotronics enhanced photocatalytic activities of Ag-BaTiO<sub>3</sub> plasmonic photocatalysts, *Journal of Alloys and Compounds*, 801 (2019) 483-488.
- [5] X. Zhou, Q. Sun, D. Zhai, G. Xue, H. Luo, D. Zhang, Excellent catalytic performance of molten-salt-synthesized Bi<sub>0.5</sub>Na<sub>0.5</sub>TiO<sub>3</sub> nanorods by the piezo-phototronic coupling effect, *Nano Energy*, 84 (2021).
- [6] H. Sun, Z. Xu, X. Xie, J. Niu, M. Wang, X. Zhang, X. Chen, J. Han, Enhanced photocatalytic activity of ferroelectric-based Ag<sub>2</sub>O/Bi<sub>4</sub>Ti<sub>3</sub>O<sub>12</sub> hybrids by piezoelectric effect, *Journal of Alloys and Compounds*, 882 (2021) 160609.
- [7] H. Xiao, W. Dong, Q. Zhao, F. Wang, Y. Guo, Visible/near-infrared light absorbed nano-ferroelectric for efficient photo-piezocatalytic water splitting and pollutants degradation, *J Hazard Mater*, 416 (2021) 125808.
- [8] X. Jiang, H. Wang, X. Wang, G. Yuan, Synergetic effect of piezoelectricity and Ag

deposition on photocatalytic performance of barium titanate perovskite, *Solar Energy*, 224 (2021) 455-461.

[9] Y. Zhang, G. Shen, C. Sheng, F. Zhang, W. Fan, The effect of piezo-photocatalysis on enhancing the charge carrier separation in BaTiO<sub>3</sub>/KNbO<sub>3</sub> heterostructure photocatalyst, *Applied Surface Science*, 562 (2021) 150164.

[10] X. Liao, T.-T. Li, H.-T. Ren, Z. Mao, X. Zhang, J.-H. Lin, C.-W. Lou, Enhanced photocatalytic performance through the ferroelectric synergistic effect of p-n heterojunction BiFeO<sub>3</sub>/TiO<sub>2</sub> under visible-light irradiation, *Ceramics International*, 47 (2021) 10786-10795.

[11] L. Shi, C. Lu, L. Chen, Q. Zhang, Y. Li, T. Zhang, X. Hao, Piezocatalytic performance of Na<sub>0.5</sub>Bi<sub>0.5</sub>TiO<sub>3</sub> nanoparticles for degradation of organic pollutants, *Journal of Alloys and Compounds*, 895 (2022) 162591.

[12] J. Zou, H. Cai, D. Wang, J. Xiao, Z. Zhou, B. Yuan, Spectrophotometric determination of trace hydrogen peroxide via the oxidative coloration of DPD using a Fenton system, *Chemosphere*, 224 (2019) 646-652.

[13] H. Cai, X. Liu, J. Zou, J. Xiao, B. Yuan, F. Li, Q. Cheng, Multi-wavelength spectrophotometric determination of hydrogen peroxide in water with peroxidase-catalyzed oxidation of ABTS, *Chemosphere*, 193 (2018) 833-839.
